# Supplementary material
Source: publisher figshare collection journal article supplement (https://asha.figshare.com/articles/dataset/_/13480368)
Supplement: Supplementary file 1 [file 1]

## Supplemental Material S2. Nouns, verbs, and associated psycholinguistic data.

| Item               | Spoken<br>Frequency | Contextual<br>Diversity | Age of<br>Acquisition | Imageability | #<br>lett | #<br>phon | #<br>syll |
|--------------------|---------------------|-------------------------|-----------------------|--------------|-----------|-----------|-----------|
| Nouns              |                     |                         |                       |              |           |           |           |
| boy                | 529.82              | 3.79                    | 150                   | 618          | 3         | 3         | 1         |
| father             | 554.49              | 3.74                    | 185                   | 646          | 6         | 4         | 2         |
| girl               | 557.12              | 3.79                    | 183                   | 634          | 4         | 4         | 1         |
| mother             | 479.92              | 3.75                    | 144                   | 638          | 6         | 4         | 2         |
| Intransitive Verbs |                     |                         |                       |              |           |           |           |
| blush              | 0.14                | 0.90                    | 385                   | 578          | 7         | 5         | 1         |
| thrive             | 0.18                | 1.00                    | 504                   | 390          | 7         | 5         | 1         |
| linger             | 0.33                | 1.20                    | 474                   | 385          | 8         | 6         | 2         |
| tremble            | 0.41                | 1.32                    | -                     | -            | 8         | 7         | 2         |
| prevail            | 0.55                | 1.45                    | -                     | -            | 9         | 7         | 2         |
| perish             | 1                   | 1.62                    | -                     | 404          | 8         | 6         | 2         |
| float              | 1.33                | 1.82                    | 321                   | 525          | 7         | 6         | 2         |
| emerge             | 1.47                | 1.85                    | -                     | -            | 7         | 5         | 2         |
| depart             | 2.71                | 2.08                    | 405                   | 472          | 8         | 7         | 3         |
| remain             | 4.37                | 2.28                    | -                     | -            | 8         | 6         | 2         |
| <i>glisten</i>     | 0.04                | 0.48                    | -                     | -            | 9         | 6         | 2         |
| <i>vanish</i>      | 5.55                | 2.39                    | -                     | -            | 8         | 6         | 2         |
| wallow             | 0.06                | 0.60                    | -                     | -            | 8         | 5         | 2         |
| cringe             | 0.08                | 0.70                    | 488                   | 490          | 7         | 6         | 1         |
| snore              | 0.24                | 1.11                    | -                     | -            | 6         | 4         | 1         |
| agonize            | 0.24                | 1.11                    | -                     | -            | 8         | 7         | 3         |
| wink               | 0.73                | 1.52                    | -                     | 501          | 6         | 5         | 1         |
| dine               | 0.88                | 1.62                    | -                     | -            | 5         | 4         | 1         |
| sneeze             | 1.25                | 1.66                    | -                     | 562          | 7         | 5         | 1         |
| wave               | 2.06                | 1.95                    | 213                   | 542          | 5         | 4         | 1         |
| complain           | 3.51                | 2.21                    | 402                   | 444          | 10        | 8         | 2         |
| scream             | 4.84                | 2.33                    | 288                   | 589          | 8         | 6         | 1         |
| <i>cower</i>       | 0.04                | 0.48                    | 510                   | 417          | 7         | 5         | 2         |
| <i>smile</i>       | 4.92                | 2.34                    | 211                   | 560          | 6         | 5         | 1         |
| Transitive Verbs   |                     |                         |                       |              |           |           |           |
| splash             | 0.63                | 1.48                    | 239                   | 512          | 8         | 6         | 1         |
| embrace            | 1.31                | 1.81                    | 484                   | 561          | 8         | 7         | 2         |
| hug                | 1.71                | 1.85                    | 245                   | -            | 6         | 4         | 1         |
| trip               | 4.33                | 2.27                    | 314                   | 520          | 7         | 5         | 1         |
| examine            | 5.39                | 2.39                    | -                     | 341          | 8         | 8         | 3         |

|                |       |      |     |     |   |   |   |
|----------------|-------|------|-----|-----|---|---|---|
| lift           | 7.06  | 2.48 | 277 | 482 | 6 | 6 | 2 |
| serve          | 19.75 | 2.93 | -   | -   | 6 | 4 | 1 |
| push           | 20.49 | 2.90 | 239 | 395 | 6 | 4 | 1 |
| kick           | 30.57 | 3.07 | 243 | 551 | 6 | 4 | 1 |
| help           | 46.82 | 3.26 | 262 | 484 | 6 | 5 | 1 |
| cuddle         | 0.24  | 1.11 | 211 | 609 | 7 | 5 | 2 |
| scold          | 0.82  | 1.56 | 392 | 426 | 7 | 7 | 2 |
| poke           | 1.31  | 1.80 | -   | -   | 5 | 4 | 1 |
| bathe          | 1.39  | 1.79 | 263 | 591 | 6 | 4 | 1 |
| slap           | 4.96  | 2.31 | 284 | 531 | 7 | 5 | 1 |
| punch          | 5.53  | 2.37 | 301 | 569 | 7 | 6 | 1 |
| chase          | 8.45  | 2.58 | 282 | 529 | 6 | 5 | 1 |
| clean          | 17.78 | 2.89 | 236 | 454 | 7 | 5 | 1 |
| carry          | 20.12 | 2.93 | -   | 393 | 7 | 5 | 2 |
| bury           | 34.08 | 3.04 | 313 | 401 | 6 | 5 | 2 |
| <i>sketch</i>  | 0.24  | 1.11 | 417 | 566 | 8 | 6 | 1 |
| <i>wrestle</i> | 0.92  | 1.65 | 413 | 558 | 8 | 5 | 2 |
| <i>greet</i>   | 1.2   | 1.78 | 413 | 494 | 7 | 6 | 2 |
| <i>guard</i>   | 3.27  | 2.19 | 392 | 530 | 7 | 5 | 2 |
| <i>bandage</i> | 8.45  | 2.58 | 263 | 550 | 8 | 7 | 2 |
| <i>watch</i>   | 26.53 | 3.03 | -   | 525 | 7 | 5 | 1 |
| <i>touch</i>   | 29.51 | 3.07 | 269 | 456 | 7 | 5 | 1 |
| <i>follow</i>  | 34.1  | 3.12 | 291 | -   | 8 | 5 | 2 |

*Note.* Italic text indicates items were used in question trials only. - = data not available; # let = number of letters (in past-tense form for verbs); # phon = number of phonemes (in past-tense form for verbs); # syll = number of syllables (in past-tense form for verbs). Spoken word frequency and contextual diversity data taken from (Brysbaert & New, 2009); age of acquisition and imageability data taken from (Bird et al., 2001; Department of Psychology, University of Western Australia, 2015).

## References

- Bird, H., Franklin, S., & Howard, D. (2001). Age of acquisition and imageability ratings for a large set of words, including verbs and function words. *Behavior Research Methods, Instruments, & Computers*, 33(1), 73–79. <https://doi.org/10.3758/BF03195349>
- Brysbaert, M., & New, B. (2009). Moving beyond Kučera and Francis: A critical evaluation of current word frequency norms and the introduction of a new and improved word frequency measure for American English. *Behavior Research Methods*, 41(4), 977–990. <https://doi.org/10.3758/BRM.41.4.977>
