# Supplementary material
Source: publisher figshare collection journal article supplement (https://asha.figshare.com/articles/dataset/_/13480368)
Supplement: Supplementary file 2 [file 1]

**Supplemental Material S1.** Stimuli used in this study.

| Sentence Type                                             | Item                                              | # syll                                  | Auditory Duration (ms) | Syllables per second |
|-----------------------------------------------------------|---------------------------------------------------|-----------------------------------------|------------------------|----------------------|
| Canonical Sentences                                       |                                                   |                                         |                        |                      |
| Unergative                                                | The boy wallowed                                  | 4                                       | 1248                   | 3.21                 |
|                                                           | The father cringed                                | 4                                       | 1170                   | 3.42                 |
|                                                           | The mother snored                                 | 4                                       | 1374                   | 2.91                 |
|                                                           | The father agonized                               | 6                                       | 1554                   | 3.86                 |
|                                                           | The boy winked                                    | 3                                       | 1141                   | 2.63                 |
|                                                           | The girl dined                                    | 3                                       | 1257                   | 2.39                 |
|                                                           | The father sneezed                                | 4                                       | 1561                   | 2.56                 |
|                                                           | The girl waved                                    | 3                                       | 1091                   | 2.75                 |
|                                                           | The boy complained                                | 4                                       | 1295                   | 3.09                 |
|                                                           | The mother screamed                               | 4                                       | 1222                   | 3.27                 |
|                                                           | <i>The mother cowered (Did the mother cower?)</i> | 5                                       | 1296                   | 3.86                 |
|                                                           | <i>The father smiled (Did the boy smile?)</i>     | 4                                       | 1208                   | 3.31                 |
|                                                           | Active                                            | The boy splashed the father             | 6                      | 1915                 |
| The girl embraced the boy                                 |                                                   | 6                                       | 1708                   | 3.51                 |
| The boy hugged the mother                                 |                                                   | 6                                       | 1411                   | 4.25                 |
| The boy tripped the father                                |                                                   | 6                                       | 1698                   | 3.53                 |
| The mother examined the father                            |                                                   | 9                                       | 1894                   | 4.75                 |
| The father lifted the mother                              |                                                   | 8                                       | 1616                   | 4.95                 |
| The girl served the mother                                |                                                   | 6                                       | 1555                   | 3.86                 |
| The boy pushed the mother                                 |                                                   | 6                                       | 1507                   | 3.98                 |
| The girl kicked the boy                                   |                                                   | 5                                       | 1558                   | 3.21                 |
| The father helped the girl                                |                                                   | 6                                       | 1736                   | 3.46                 |
| <i>The mother greeted the girl (Did the girl greet?)</i>  |                                                   | 7                                       | 1547                   | 4.52                 |
| <i>The boy bandaged the father (Did the boy bandage?)</i> |                                                   | 7                                       | 1924                   | 3.64                 |
| Subject-Cleft                                             |                                                   | It was the mother who splashed the girl | 9                      | 2254                 |
|                                                           | It was the mother who embraced the father         | 11                                      | 2328                   | 4.73                 |
|                                                           | It was the girl who hugged the father             | 9                                       | 2099                   | 4.29                 |
|                                                           | It was the girl who tripped the mother            | 9                                       | 2084                   | 4.32                 |
|                                                           | It was the boy who examined the girl              | 10                                      | 2276                   | 4.39                 |
|                                                           | It was the boy who lifted the girl                | 9                                       | 2001                   | 4.50                 |
|                                                           | It was the boy who served the father              | 9                                       | 2165                   | 4.16                 |
|                                                           | It was the father who pushed the girl             | 9                                       | 2094                   | 4.30                 |
|                                                           | It was the mother who kicked the father           | 10                                      | 2143                   | 4.67                 |
|                                                           | It was the boy who helped the mother              | 9                                       | 1943                   | 4.63                 |

|                                                   |                                                                                      |                                    |      |       |      |
|---------------------------------------------------|--------------------------------------------------------------------------------------|------------------------------------|------|-------|------|
|                                                   | <i>It was the boy who guarded the girl (Did the girl guard?)</i>                     | 9                                  | 2138 | 4.21  |      |
|                                                   | <i>It was the mother who watched the father (Did the mother watch?)</i>              | 10                                 | 2386 | 4.19  |      |
| Subject-Relative                                  | The girl who splashed the boy cuddled the father                                     | 11                                 | 2883 | 3.82  |      |
|                                                   | The mother who embraced the father scolded the girl                                  | 13                                 | 2996 | 4.34  |      |
|                                                   | The mother who hugged the father poked the girl                                      | 11                                 | 2640 | 4.17  |      |
|                                                   | The girl who tripped the boy bathed the mother                                       | 10                                 | 2660 | 3.76  |      |
|                                                   | The father who examined the girl slapped the boy                                     | 12                                 | 2772 | 4.33  |      |
|                                                   | The father who lifted the girl punched the mother                                    | 12                                 | 2651 | 4.53  |      |
|                                                   | The father who served the mother chased the boy                                      | 11                                 | 2724 | 4.04  |      |
|                                                   | The mother who pushed the girl cleaned the boy                                       | 10                                 | 2573 | 3.89  |      |
|                                                   | The boy who kicked the mother carried the girl                                       | 11                                 | 2509 | 4.38  |      |
|                                                   | The boy who helped the mother buried the father                                      | 12                                 | 2584 | 4.64  |      |
|                                                   | <i>The boy who sketched the girl touched the father (Did the boy sketch?)</i>        | 10                                 | 2727 | 3.67  |      |
|                                                   | <i>The father who wrestled the boy followed the mother (Did the father wrestle?)</i> | 13                                 | 2836 | 4.58  |      |
|                                                   | Noncanonical Sentences                                                               |                                    |      |       |      |
|                                                   | Unaccusative                                                                         | The girl blushed                   | 3    | 1178  | 2.55 |
| The mother thrived                                |                                                                                      | 4                                  | 1369 | 2.92  |      |
| The father lingered                               |                                                                                      | 5                                  | 1147 | 4.36  |      |
| The boy trembled                                  |                                                                                      | 4                                  | 1233 | 3.24  |      |
| The boy prevailed                                 |                                                                                      | 4                                  | 1271 | 3.15  |      |
| The girl perished                                 |                                                                                      | 4                                  | 1265 | 3.16  |      |
| The mother floated                                |                                                                                      | 5                                  | 1182 | 4.23  |      |
| The father emerged                                |                                                                                      | 5                                  | 1386 | 3.61  |      |
| The girl departed                                 |                                                                                      | 5                                  | 1271 | 3.93  |      |
| The mother remained                               |                                                                                      | 5                                  | 1286 | 3.89  |      |
| <i>The boy glistened (Did the boy glisten?)</i>   |                                                                                      | 4                                  | 1120 | 3.57  |      |
| <i>The girl vanished (Did the father vanish?)</i> |                                                                                      | 4                                  | 1251 | 3.120 |      |
| Passive                                           |                                                                                      | The father was splashed by the boy | 8    | 2062  | 3.88 |
|                                                   | The boy was embraced by the girl                                                     | 8                                  | 2251 | 3.55  |      |
|                                                   | The mother was hugged by the boy                                                     | 8                                  | 1897 | 4.22  |      |

|                                                                         |                                                                     |      |      |      |
|-------------------------------------------------------------------------|---------------------------------------------------------------------|------|------|------|
|                                                                         | The father was tripped by the boy                                   | 8    | 2029 | 3.94 |
|                                                                         | The father was examined by the mother                               | 11   | 2297 | 4.79 |
|                                                                         | The mother was lifted by the father                                 | 10   | 2035 | 4.91 |
|                                                                         | The mother was served by the girl                                   | 8    | 1956 | 4.09 |
|                                                                         | The mother was pushed by the boy                                    | 8    | 1835 | 4.36 |
|                                                                         | The boy was kicked by the girl                                      | 7    | 1823 | 3.84 |
|                                                                         | The girl was helped by the father                                   | 8    | 2038 | 3.93 |
|                                                                         | <i>The girl was greeted by the mother (Did the girl greet?)</i>     | 9    | 2002 | 4.50 |
|                                                                         | <i>The father was bandaged by the boy (Did the father bandage?)</i> | 9    | 2102 | 4.28 |
| Object-Cleft                                                            | It was the girl who the mother splashed                             | 9    | 2463 | 3.65 |
|                                                                         | It was the father who the mother embraced                           | 11   | 2411 | 4.56 |
|                                                                         | It was the father who the girl hugged                               | 9    | 2164 | 4.16 |
|                                                                         | It was the mother who the girl tripped                              | 9    | 2081 | 4.32 |
|                                                                         | It was the girl who the boy examined                                | 10   | 2257 | 4.43 |
|                                                                         | It was the girl who the boy lifted                                  | 9    | 2058 | 4.37 |
|                                                                         | It was the father who the boy served                                | 9    | 2152 | 4.18 |
|                                                                         | It was the girl who the father pushed                               | 9    | 2093 | 4.30 |
|                                                                         | It was the father who the mother kicked                             | 10   | 2056 | 4.86 |
|                                                                         | It was the mother who the boy helped                                | 9    | 1966 | 4.58 |
|                                                                         | <i>It was the girl who the boy guarded (Did the girl guard?)</i>    | 9    | 2083 | 4.32 |
| <i>It was the father who the mother watched (Did the father watch?)</i> | 10                                                                  | 2266 | 4.41 |      |
| Object-Relative                                                         | The boy who the girl splashed cuddled the father                    | 11   | 2870 | 3.83 |
|                                                                         | The father who the mother embraced scolded the girl                 | 13   | 3232 | 4.02 |
|                                                                         | The father who the mother hugged poked the girl                     | 11   | 2712 | 4.06 |
|                                                                         | The boy who the girl tripped bathed the mother                      | 10   | 2697 | 3.71 |
|                                                                         | The girl who the father examined slapped the boy                    | 12   | 3079 | 3.90 |
|                                                                         | The girl who the father lifted punched the mother                   | 12   | 2560 | 4.69 |
|                                                                         | The mother who the boy served chased the father                     | 11   | 2719 | 4.05 |
|                                                                         | The girl who the mother pushed cleaned the boy                      | 10   | 2814 | 3.55 |
|                                                                         | The mother who the boy kicked carried the girl                      | 11   | 2523 | 4.36 |
|                                                                         | The mother who the boy helped buried the father                     | 12   | 2700 | 4.44 |

|                                                                                      |    |      |      |
|--------------------------------------------------------------------------------------|----|------|------|
| <i>The girl who the boy sketched touched the father (Did the girl sketch?)</i>       | 10 | 2920 | 3.42 |
| <i>The boy who the father wrestled followed the mother (Did the father wrestle?)</i> | 13 | 2812 | 4.62 |

---

*Note.* Italic text = sentences used in question trials only; question provided in parentheses.

# syll = number of syllables.
